# Supplementary material for: Tensile and torsional elastomer fiber artificial muscle by entropic elasticity with thermo-piezoresistive sensing of strain and rotation by a single electric signal
Source: Royal Society of Chemistry journal article supplement (doi:10.1039/d0mh01003k), 2020-01-01
Supplement: d0mh01003k1.pdf [file d0mh01003k1.pdf]

## ELECTRONIC SUPPLEMENTARY INFORMATION

### **Tensile and Torsional Elastomer Fiber Artificial Muscle by Entropic Elasticity with Thermo-Piezoresistive Sensing of Strain and Rotation by Single Electric Signal**

Run Wang,<sup>‡a</sup> Yanan Shen,<sup>‡b</sup> Dong Qian<sup>c</sup>, Jinkun Sun,<sup>b</sup> Xiang Zhou,<sup>c</sup> Weichao Wang<sup>a</sup> and  
Zunfeng Liu<sup>\*ab</sup>

<sup>a</sup>State Key Laboratory of Medicinal Chemical Biology, College of Chemistry and College of Electronic Information and Optics Engineering, Key Laboratory of Functional Polymer Materials, Nankai University, Tianjin 300071, China

<sup>b</sup>College of Pharmacy, Nankai University, Tianjin, 300071, China

<sup>c</sup>Department of Mechanical Engineering, The University of Texas at Dallas, Richardson, TX 75080, USA

<sup>d</sup>Department of Science, China Pharmaceutical University, Nanjing, Jiangsu, 211198, China

<sup>‡</sup> These authors contributed equally to this work.

\*Corresponding author E-mail: liuzunfeng@nankai.edu.cn

#### **This file includes:**

Supplementary Section S1(Pages 2–3)

Supplementary Figures S1 to S9 (Pages 4–9)

Supplementary Table S1 and S2 (Page 10–11 )

## S1. Theoretical section for the torsional actuation

First we consider the torque balance before the application of the heat. As mentioned in the section 2.2, the CNT<sub>m</sub>/elastomer fiber was first connected to a thin elastomer fiber and then twist was inserted. The total twist can be given as  $\theta = \tau \left( \frac{1}{k_1} + \frac{1}{k_2} \right)$ , in which  $\tau$  is the applied torque before heating, and  $k_1, k_2$  are the torsional stiffness for the CNT<sub>m</sub>/elastomer fiber and thin elastomer fiber, respectively. After the heat is applied,  $k_1$  increases to  $k_1'$ . This increase can be explained by the formula for torsional stiffness, given as  $\frac{GJ}{l}$ , with  $l$  the length,  $G$  the shear modulus and  $J$  the polar second moment of area of the cross-section,  $J = \frac{\pi d^4}{32}$ . When heat is applied,  $l$  will reduce due to increase in elastic modulus,  $d$  will correspondingly increase due to incompressibility and  $G$  will increase due to entropic elasticity. Therefore, overall  $k_1$  increases.

Since the fibers are torsionally tethered at both ends after twist insertion and thermal activation, the total twist remains unchanged. The torque  $\tau$  in the fibers need to be changed to  $\tau'$  in order to satisfy this constraint, *i.e.*,

$$\tau \left( \frac{1}{k_1} + \frac{1}{k_2} \right) = \tau' \left( \frac{1}{k_1'} + \frac{1}{k_2} \right) \quad (1).$$

From eqn. (1), the updated torque due to heating is given as

$$\tau' = \tau \frac{\left( 1 + \frac{k_2}{k_1} \right)}{\left( 1 + \frac{k_2}{k_1'} \right)} \quad (2),$$

and the ratio of the twist angles  $\left( \frac{\theta_1'}{\theta_1} \right)$  in the CNT<sub>m</sub>/elastomer fiber after and before heating can be given as

$$\frac{\theta_1'}{\theta_1} = \frac{\frac{\tau'}{\tau}}{\frac{\tau}{\tau}} = \frac{\frac{\tau'}{\tau}}{\frac{\tau}{k_1}} = \frac{k_1}{k_1'} \frac{\left( 1 + \frac{k_2}{k_1} \right)}{\left( 1 + \frac{k_2}{k_1'} \right)} = \frac{k_1 + k_2}{k_1' + k_2} \quad (3).$$

Eqn. (3) shows that the change in the twist angle in the CNT<sub>m</sub>/elastomer fiber is inversely proportional to the change in the torsional stiffness in the same fiber. An increase from  $k_1$  to  $k'_1$  leads to a reduction in the twist angle in the CNT<sub>m</sub>/elastomer fiber, which explains the observed untwist. The torsional actuation in this work is based on a twisted, non-coiled fiber muscle, which is different from the stretch-induced twist increase for a coiled configuration, where stretch-twist coupling could be involved with decrease in length, leading to twist increase in a coiled configuration.<sup>1</sup>

The twist angle change ( $\Delta\theta_1$ ) of the CNT<sub>m</sub>/elastomer fiber can be derived from Eqn. (3) above, given as

$$\Delta\theta_1 = \frac{k'_1 - k_1}{k'_1 + k_2} \frac{k_2}{k_1 + k_2} \theta \quad (4).$$

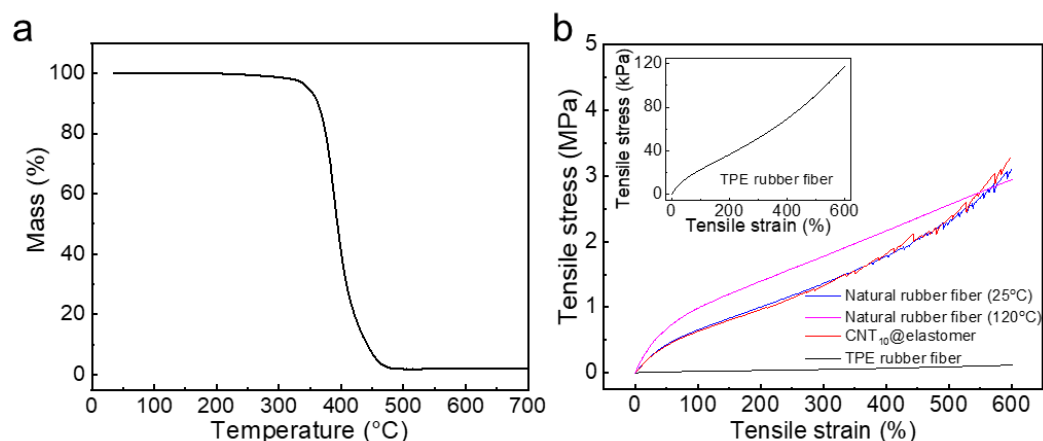

**Fig. S1.**

(a) Percent mass loss as a function of temperature for the natural rubber fiber in thermal gravimetric analysis measurement at a heating rate of 20°C/min in N<sub>2</sub> atmosphere. (b) The stress-strain curves for the natural rubber fiber at 25°C and 120°C, TPE rubber at 25°C, and the CNT<sub>10</sub>/elastomer fiber at 25°C. The inset of (b) shows a stress-strain curve of the TPE rubber at a smaller scale of y axis.

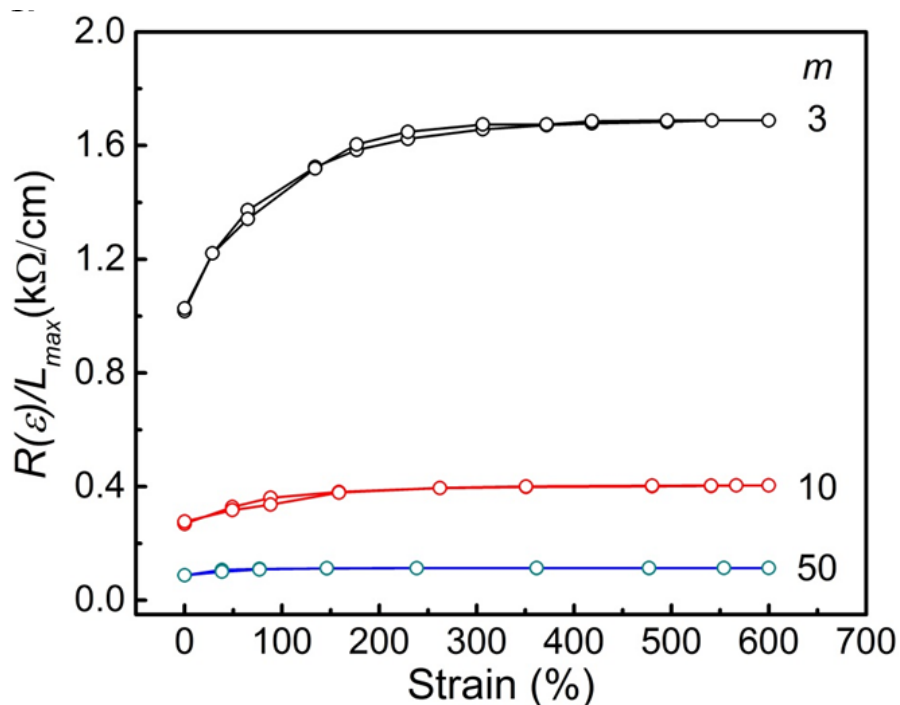

**Fig. S2.**

(a) Length-normalized resistance as a function of strain for the CNT<sub>m</sub>/elastomer fiber.

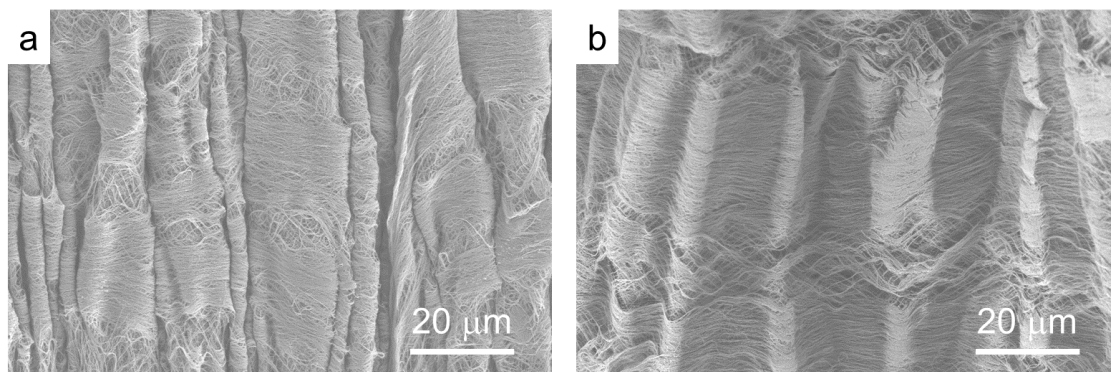

**Fig. S3.** SEM images of the CNT<sub>10</sub>/elastomer at (a) 0% and (b) 200% strains, showing that the contacting content of buckles decreased with increase in strain.

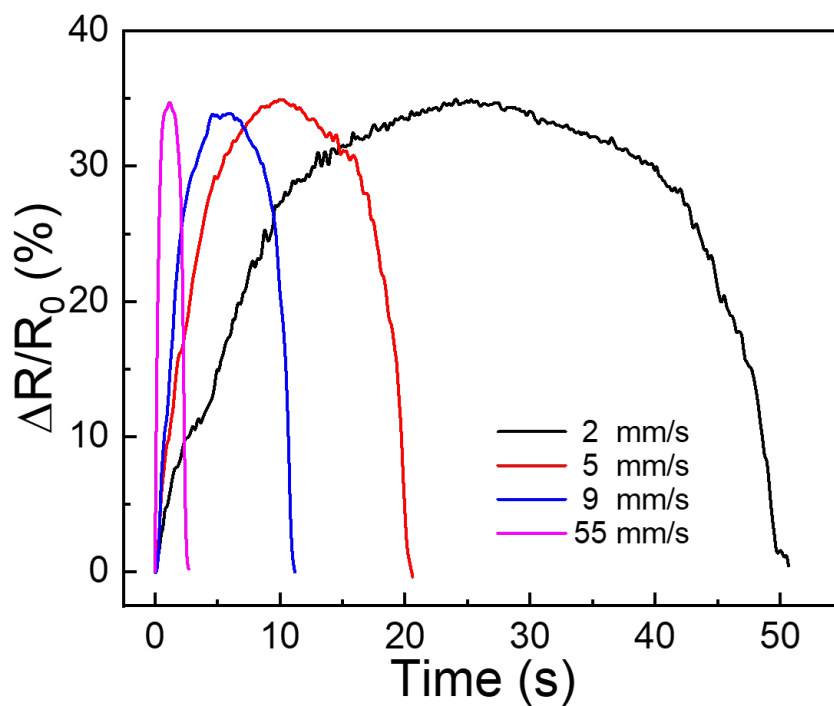

**Fig. S4.** Percent resistance change of the CNT<sub>10</sub>/elastomer fiber as a function of time during stretching up to 110% strain at different stretch rates. The initial length of CNT<sub>10</sub>/elastomer fiber was 4.5 cm.

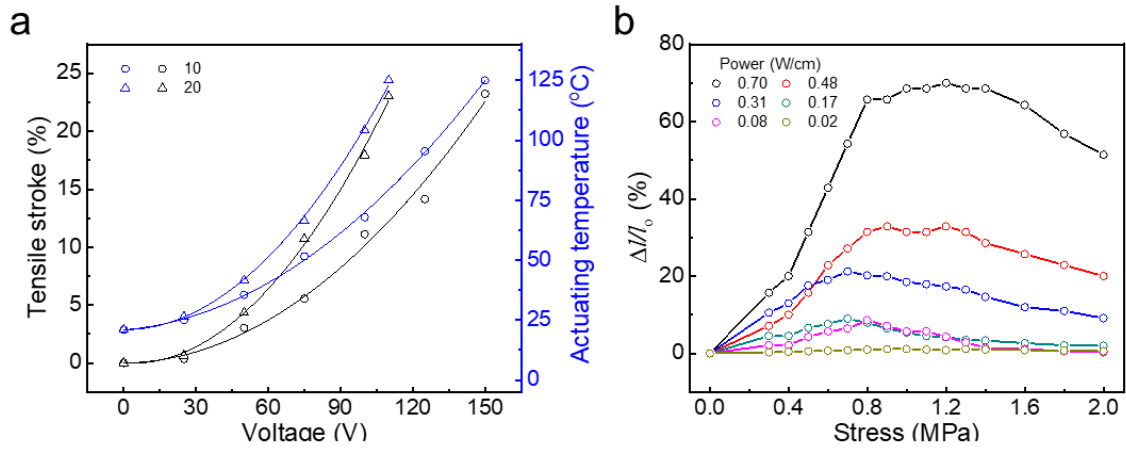

**Fig. S5.**

(a) Tensile stroke and temperature as a function of applied voltage for  $\text{CNT}_m/\text{elastomer}$  muscles at isobaric stress of 0.8 MPa for  $m=10$  and 20. (b) Apparent tensile stroke ( $\Delta l/l_0$ ) of a  $\text{CNT}_{10}/\text{elastomer}$  muscle as a function of isobaric stress under different input electric power.

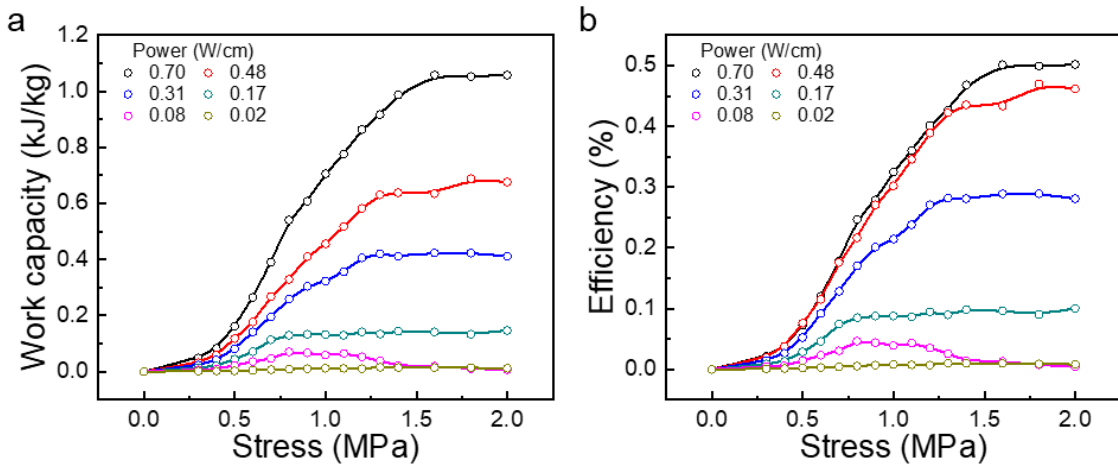

**Fig. S6.**

Work capacity (a) and efficiency (b) of a  $\text{CNT}_{10}/\text{elastomer}$  muscle as a function of isobaric stress under different input electric power.

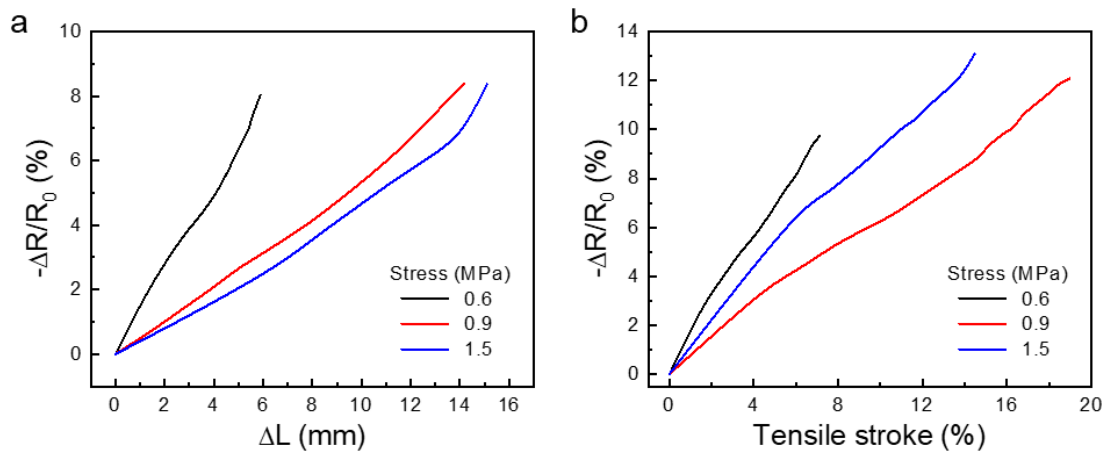

**Fig. S7.**

(a, b) Percent resistance decrease as a function of muscle length change (a) and as a function of tensile stroke (b) during electro-thermal actuation of a CNT<sub>10</sub>/elastomer muscle at different isobaric stresses. The applied voltage is 45 V, and the CNT<sub>10</sub>/elastomer muscle is not twisted.

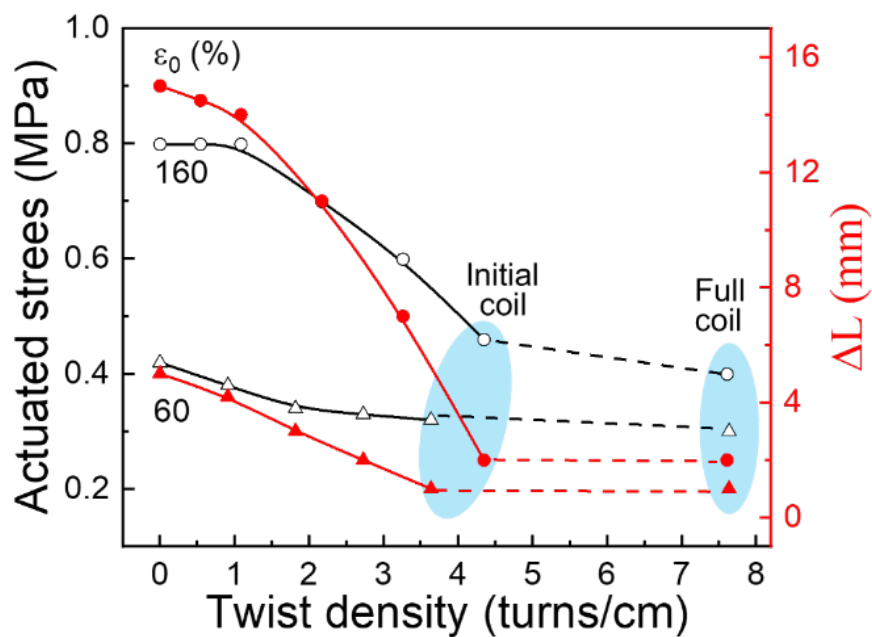

**Fig. S8.** The stress used to keep the same value of the initial length before actuation, and length decrease during actuation as a function of inserted twist for the torsional CNT<sub>10</sub>/elastomer muscle. The applied electric power was 0.62 W/cm, the initial muscle elongation was  $\epsilon_0 = 160\%$  and 60%, respectively, for different inserted twist. The initial muscle length before actuation is the same for different inserted twist.

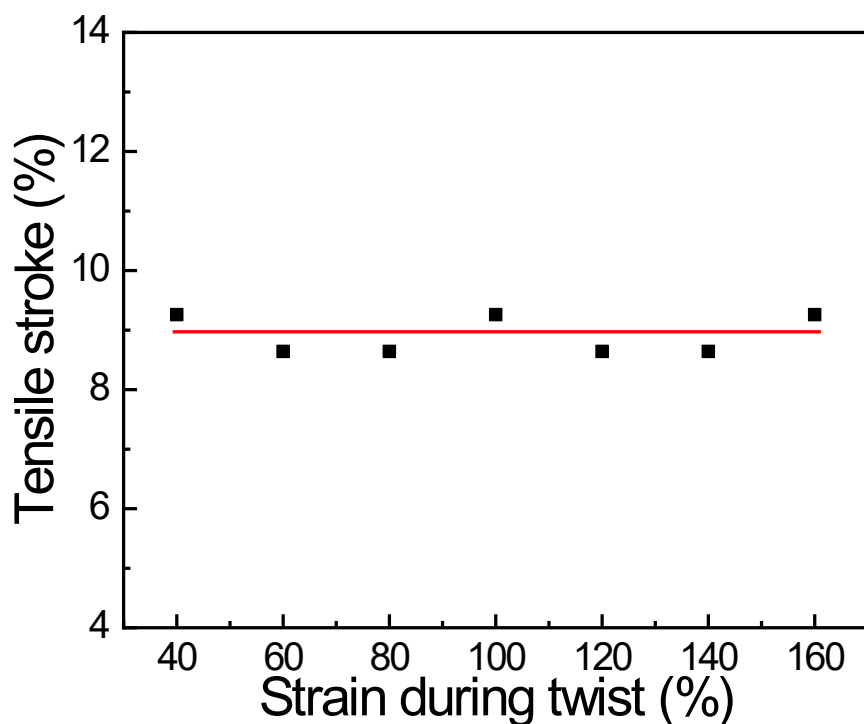

**Fig. S9.**

The tensile stroke of a twisted CNT<sub>10</sub>/elastomer muscle that was twisted at different isometric strain. The muscle was isobarically loaded with 0.5 MPa weight and electro-thermally actuated under 0.31 W/cm electric power.

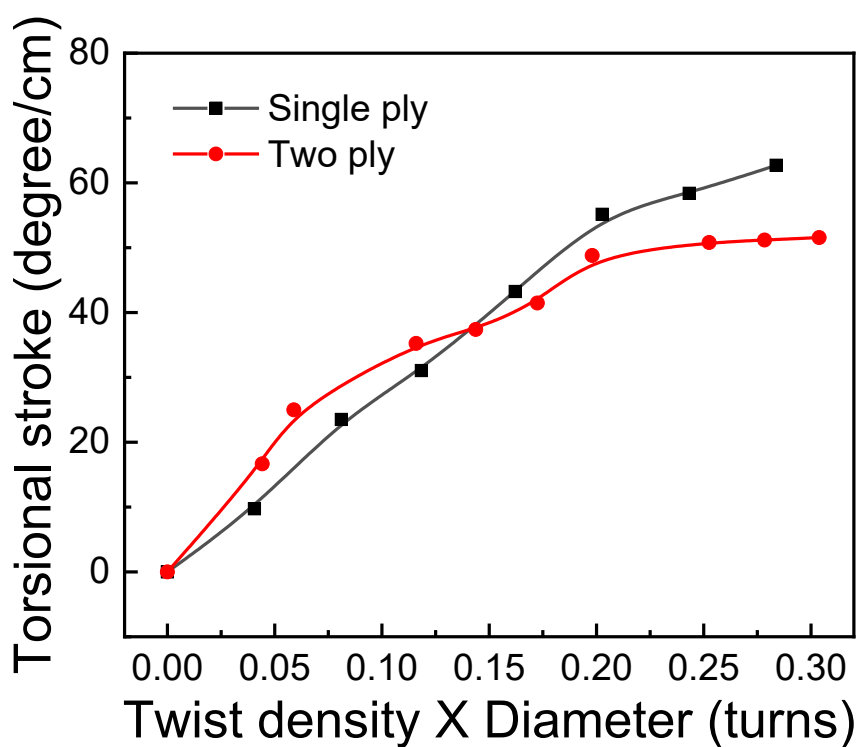

**Fig. S10.**

Torsional stroke as a function of the product of twist density and the fiber diameter.



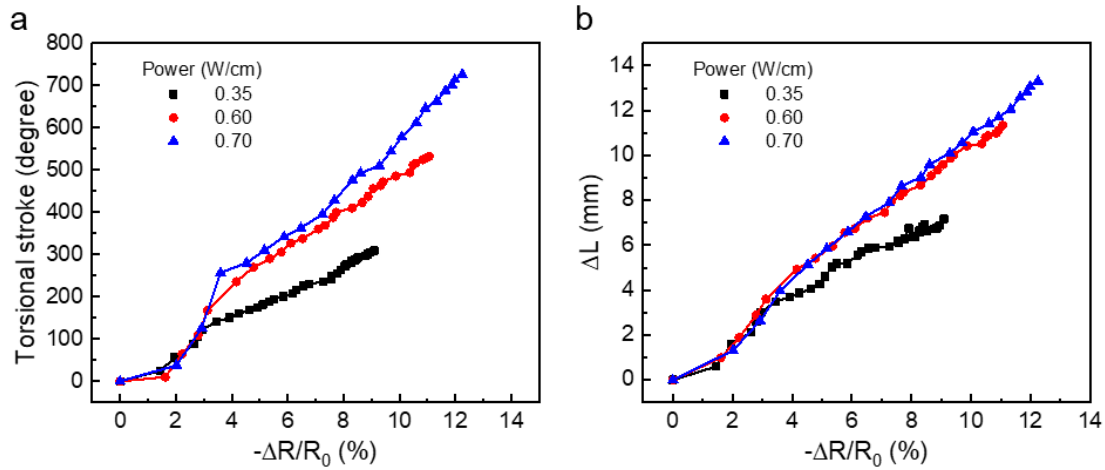

**Fig. S11.**

(a, b) Torsional stroke (a) and muscle length change (b) as function of percent resistance change during electro-thermal actuation of a torsional CNT<sub>10</sub>/elastomer muscle at different applied electric power. The twist density of the CNT<sub>10</sub>/elastomer was 1.7 turns/cm, and the isobaric load was 0.8 MPa.

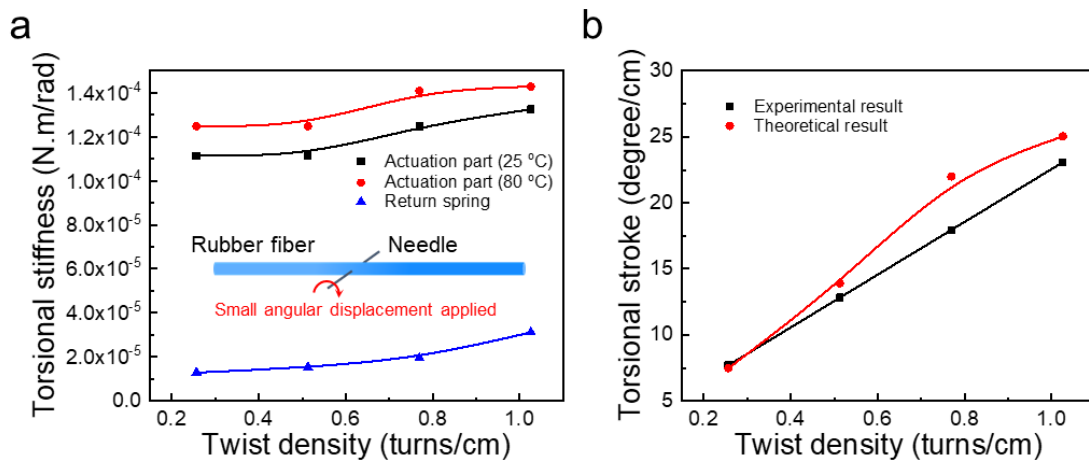

**Fig. S12.**

(a) Torsional stiffness as a function of twist density for a CNT<sub>10</sub>/elastomer muscle. The inset in (a) schematically illustrates the apparatus for measuring the torsional stiffness of the actuation part and the return spring of a torsional CNT<sub>m</sub>/elastomer muscle. (b) Comparison of experimentally measured and theoretically calculated torsional strokes for a CNT<sub>10</sub>/elastomer muscle under isobaric load of 0.3 MPa. The non-loaded muscle fiber is 3.0 cm in length and 2.0 mm in diameter, and the return spring fiber is 3.8 cm in length and 0.8 mm in diameter.

Table S1 Comparison of performance of the artificial muscle in this work with other elastomer based artificial muscles.

| Materials         | Stimulus                         | Optimal actuation |            | Tensile stroke (%)       | Torsional stroke (%/cm) | Sensing function | Maximum work capacity                | Efficiency (%) | Ref. |
|-------------------|----------------------------------|-------------------|------------|--------------------------|-------------------------|------------------|--------------------------------------|----------------|------|
|                   |                                  | Stress (MPa)      | Strain (%) |                          |                         |                  |                                      |                |      |
| VHB 4910          | Electro-filed (412 MV/m)         | -                 | (300, 300) | 61 thickness<br>158 area | No                      | No               | -                                    | -              | 2    |
|                   | Electro-filed (239 MV/m)         | -                 | (500, 75)  | 68 thickness<br>215 area | No                      | No               | -                                    | -              |      |
| VHB 4910          | Electro-filed (18 kV, 1620 MV/m) | -                 | (200, 200) | 167 area                 | No                      | No               |                                      |                | 3    |
| IPN VHB 4910      | Electro-filed (65 MV/m)          | 2.6 kg            | (0, 0)     | 10                       | No                      | No               | 0.013 kJ/kg                          |                | 4    |
| Wacker Elastosil  | Electro-filed (29.5 MV/m)        | 0.1 kg            | (0, 0)     | 5.2                      | No                      | No               | -                                    | -              | 5    |
| Wacker Elastosil  | Electro-filed (2.5 kV, 90 MV/m)  | 10.0 kg           | (20, 20)   | 3.4                      | No                      | No               | 1620 kJ/m <sup>3</sup>               | -              | 6    |
| SEBS              | Electro-filed (10.3 MV/m)        | 0.01              | -          | 4.1                      | 21.8                    | No               | -                                    | -              | 7    |
| LCE               | Thermal (35-200°C)               | 0                 | 0          | 55                       | No                      | No               | 0.003 kJ/kg<br>3.6 kJ/m <sup>3</sup> | -              | 8    |
| LCE               | Thermal (100-140°C)              | 0.14              | 20         | 37                       | No                      | No               | -                                    | -              | 9    |
|                   | Thermal (50-130°C)               | 0.048             | 10         | 28                       | No                      | No               | -                                    | -              |      |
| IPN-LCE           | Thermal (40-140°C)               | 22.0              | 40         | 50                       | No                      | No               | 1.83 kJ/kg<br>1268 kJ/m <sup>3</sup> |                | 10   |
| LCE               | Thermal (25-150°C)               | 0.84              | 35         | 63                       | No                      | No               | 731 kJ/m <sup>3</sup>                | -              | 11   |
| LCE               | Thermal (85-125°C)               | 0.3               | 82         | 37                       | No                      | No               | -                                    |                | 12   |
| LCP               | Photo-thermal                    | 2.3 g             | 800        | 64                       | No                      | No               | 81 kJ/m <sup>3</sup>                 |                | 13   |
| LCE/CNT           | Electro-thermal (150°C)          | 0.84              | -          | 12                       | No                      | No               | 97 kJ/m <sup>3</sup>                 |                | 14   |
| LCE               | Thermal (25-150°C)               | 0.29              | 140        | 28                       | No                      | No               | 0.05 kJ/kg<br>97 kJ/m <sup>3</sup>   |                | 15   |
| Spandex rubber    | Electro-thermal (RT-70°C)        | 9.6               | 100        | 12.4                     | No                      | No               | 0.64 kJ/kg                           | 3.2            | 16   |
| Polyacrylic ester | Electro-thermal (RT-80°C)        | 3.7               | -          | 21                       | No                      | No               | 1.16 kJ/kg                           | -              | 17   |
| Spandex rubber    | Thermal (20-130°C)               | 1.96 N            | -          | 14                       | No                      | No               | 0.598 kJ/kg                          | -              | 18   |
| Nature rubber     | Electro-thermal                  | 1.0               | -          | 5                        | No                      | No               | -                                    | 0.02           | 19   |

|                        |                            |          |     |       |      |                                     |                                      |     |           |
|------------------------|----------------------------|----------|-----|-------|------|-------------------------------------|--------------------------------------|-----|-----------|
| Nature skeletal muscle | Chemical energy            | 0.1-0.35 | -   | 20-40 | -    | Motor neuron system                 | 0.04 kJ/kg<br>40 kJ/m <sup>3</sup>   | 40  | 20        |
| Nature rubber          | Electro-thermal (25-125°C) | 0.8      | 180 | 23    | 87.5 | Thermo-Piezoresistive strain sensor | 1.06 kJ/kg<br>1026 kJ/m <sup>3</sup> | 0.5 | This work |

IPN: interpenetrating polymer networks; SEBS: styrene-ethylene-butylene-styrene; LCE: liquid crystal elastomer; LCP: liquid crystal polymer; CNT: carbon nanotube sheet; ATP: adenosine triphosphate. Torsional stroke is normalized by muscle length.

Table S2 Comparison of the artificial muscle in this work with other actuating systems.

| Actuator              | Structure                               | Stimulus                     | Sensor                                                    | One single signal (stimulus and sensor) | Feedback loop control | Ref.      |
|-----------------------|-----------------------------------------|------------------------------|-----------------------------------------------------------|-----------------------------------------|-----------------------|-----------|
| Bending               | Microchannel and corrugation            | Pneumatic                    | Resistance strain sensor                                  | Separately                              | No                    | 21        |
| Bending               | Bimorph                                 | Magnetic filed               | Piezoresistance sensor                                    | Separately                              | No                    | 22        |
| Tensile               | Coil                                    | Electro-thermal              | Capacitive strain sensor                                  | Separately                              | No                    | 23        |
| Bending               | Bimorph                                 | Moisture, thermal, and light | Resistance sensor                                         | Separately                              | No                    | 24        |
| Bending               | Sandwich                                | Electric filed               | Resistance sensor                                         | Separately                              | No                    | 25        |
| Tensile               | Tendril                                 | Heat                         | Piezoresistive strain sensor                              | Separately                              | No                    | 26        |
| Bending               | Bimorph                                 | Electro-thermal              | Pyroelectric temperature and piezoresistive strain sensor | Separately                              | No                    | 27        |
| Expansion             | Sandwich                                | Dielectric                   | Capacitive sensor                                         | Together                                | No                    | 28        |
| Bending               | Bimorph                                 | Electro-thermal              | Resistance strain sensor                                  | Together                                | No                    | 29        |
| Bending               | solid on one side and slit on the other | Pneumatic                    | Optoelectronic strain sensor                              | Separately                              | Yes                   | 30        |
| Expansion             | Sandwich                                | Dielectric                   | Capacitive sensor                                         | Together                                | Yes                   | 31        |
| Tensile               | Cylindrical                             | Chemical energy              | Muscle spindle                                            | Together                                | Yes                   | 32        |
| Tensile and torsional | Twisted fiber                           | Electro-thermal              | Thermo-piezoresistive strain sensor                       | Together                                | Yes                   | This work |

## References

1. A. Ghatak and L. Mahadevan, *Phys. Rev. Lett.*, 2005, **95**, 057801.
2. R. Pelrine, R. Kornbluh, Q. Pei and J. Joseph, *Science*, 2000, **287**, 836-839.
3. C. Keplinger, J.-Y. Sun, C. C. Foo, P. Rothemund, G. M. Whitesides and Z. Suo, *Science*, 2013, **341**, 984-987.
4. G. Kovacs, L. Düring, S. Michel and G. Terrasi, *Sensor Actuat. A-Phys*, 2009, **155**, 299-307.
5. H. S. Jung, S. Y. Yang, K. H. Cho, M. G. Song, C. T. Nguyen, H. Phung, U. Kim, H. Moon, J. C. Koo and J.-D. Nam, *Int. J. Control Autom*, 2017, **15**, 25-35.
6. S. Hau, G. Rizzello and S. Seelecke, *Extreme Mech. Lett.*, 2018, **23**, 24-28.
7. Z. Liu, S. Fang, F. Moura, J. Ding, N. Jiang, J. Di, M. Zhang, X. Lepró, D. Galvão and C. Haines, *Science*, 2015, **349**, 400-404.
8. T. H. Ware, M. E. McConney, J. J. Wie, V. P. Tondiglia and T. J. White, *Science*, 2015, **347**, 982-984.
9. D. L. Thomsen, P. Keller, J. Naciri, R. Pink, H. Jeon, D. Shenoy and B. R. Ratna, *Macromolecules*, 2001, **34**, 5868-5875.
10. H.-F. Lu, M. Wang, X.-M. Chen, B.-P. Lin and H. Yang, *J. Am. Chem. Soc.*, 2019, **141**, 14364-14369.
11. H. Kim, J. M. Boothby, S. Ramachandran, C. D. Lee and T. H. Ware, *Macromolecules*, 2017, **50**, 4267-4275.
12. Z. Pei, Y. Yang, Q. Chen, E. M. Terentjev, Y. Wei and Y. Ji, *Nat. Mater.*, 2014, **13**, 36-41.
13. X. Pang, L. Qin, B. Xu, Q. Liu and Y. Yu, *Adv. Funct. Mater.*, 2020, **30**, 2002451.
14. H. Kim, J. A. Lee, C. P. Ambulo, H. B. Lee, S. H. Kim, V. V. Naik, C. S. Haines, A. E. Aliev, R. Ovalle - Robles and R. H. Baughman, *Adv. Funct. Mater.*, 2019, **29**, 1905063.
15. T. Ware and T. White, *Polym. Chem.*, 2015, **6**, 4835-4844.
16. J. Foroughi, G. M. Spinks, S. Aziz, A. Mirabedini, A. Jeiranikhameneh, G. G. Wallace, M. E. Kozlov and R. H. Baughman, *ACS Nano*, 2016, **10**, 9129-9135.
17. J. Mu, C. Hou, G. Wang, X. Wang, Q. Zhang, Y. Li, H. Wang and M. Zhu, *Adv. Mater.*, 2016, **28**, 9491-9497.
18. S. Y. Yang, K. H. Cho, Y. Kim, M.-G. Song, H. S. Jung, J. W. Yoo, H. Moon, J. C. Koo and H. R. Choi, *Smart Mater. Struct.*, 2017, **26**, 105025.
19. P.-J. Cottinet, D. Guyomar, J. Galineau and G. Sebald, *Sensor Actuat. A-Phys*, 2012, **180**, 105-112.
20. J. D. Madden, N. A. Vandesteeg, P. A. Anquetil, P. G. Madden, A. Takshi, R. Z. Pytel, S. R. Lafontaine, P. A. Wieringa and I. W. Hunter, *IEEE J. Ocean. Eng.*, 2004, **29**, 706-728.
21. J. C. Yeo, H. K. Yap, W. Xi, Z. Wang, C. H. Yeow and C. T. Lim, *Adv. Mater. Technol.*, 2016, **1**, 1600018.
22. H.-P. Phan, T. Dinh, T.-K. Nguyen, A. Vatani, A. R. Md Foisal, A. Qamar, A. R. Kermany, D. V. Dao and N.-T. Nguyen, *Appl. Phys. Lett.*, 2017, **110**, 144101.
23. H. Wang, Z. Liu, J. Ding, X. Lepró, S. Fang, N. Jiang, N. Yuan, R. Wang, Q. Yin and W. Lv, *Adv. Mater.*, 2016, **28**, 4998-5007.
24. H. Cheng, F. Zhao, J. Xue, G. Shi, L. Jiang and L. Qu, *ACS Nano*, 2016, **10**, 9529-9535.
25. K. Kruusamäe, P. Brunetto, S. Graziani, A. Punning, G. Di Pasquale and A. Aabloo, *Polym. Int.*, 2010, **59**, 300-304.
26. M. Kanik, S. Orguc, G. Varnavides, J. Kim, T. Benavides, D. Gonzalez, T. Akintilo, C. C. Tasan, A. P. Chandrakasan and Y. Fink, *Science*, 2019, **365**, 145-150.
27. X. Q. Wang, K. H. Chan, Y. Cheng, T. Ding, T. Li, S. Achavananthadith, S. Ahmet, J. S. Ho and G. W. Ho, *Adv. Mater.*, 2020, **32**, 2000351.
28. T. A. Gisby, B. M. O'Brien and I. A. Anderson, *Appl. Phys. Lett.*, 2013, **102**, 193703.
29. M. Amjadi and M. Sitti, *Adv. Sci.*, 2018, **5**, 1800239.

30. H. Zhao, K. O'Brien, S. Li and R. F. Shepherd, *Sci. Robot.*, 2016, **1**, eaai7529.
31. S. Rosset, B. M. O'Brien, T. Gisby, D. Xu, H. R. Shea and I. A. Anderson, *Smart Mater. Struct.*, 2013, **22**, 104018.
32. M. Hulliger, in *Reviews of Physiology, Biochemistry and Pharmacology, Volume 101*, Springer, 1984, pp. 1-110.
